# Supplementary material for: Green synthesis of graphene oxide (GO)-anchored Pd/Cu bimetallic nanoparticles usingOcimum sanctumas bio-reductant: an efficient heterogeneous catalyst for the Sonogashira cross-coupling reaction
Source: Royal Society of Chemistry journal article supplement (doi:10.1039/d0ra01189d), 2020-01-01

## Green synthesis of graphene oxide (GO)- anchored Pd/Cu bimetallic nanoparticles using *Ocimum sanctum* as bio-reductant: an efficient heterogeneous catalyst for the Sonogashira Cross-Coupling reaction

Samim Sultana<sup>1</sup>, Swapna Devi Mech<sup>1</sup>, Farhaz Liaquat Hussain<sup>2</sup>, Pallab Pahari<sup>2</sup>, Geetika Borah<sup>1\*</sup>, Pradip K. Gogoi<sup>1\*</sup>

<sup>1</sup>Department of Chemistry, Dibrugarh University, Dibrugarh-786004, Assam, India

<sup>2</sup>Applied Organic Chemistry Group, Chemical Science and Technology Division, CSIR-North East Institute of Science and Technology, Jorhat-785006, Assam, India

Email id: [samimsultana786@gmail.com](mailto:samimsultana786@gmail.com), [swapnadevimech@gmail.com](mailto:swapnadevimech@gmail.com), [flhussain786@gmail.com](mailto:flhussain786@gmail.com),  
[ppahari@gmail.com](mailto:ppahari@gmail.com), [geetikachem@yahoo.co.in](mailto:geetikachem@yahoo.co.in), [pradip54@gmail.com](mailto:pradip54@gmail.com)

### GC-MS spectra of the products of reactions of Table 5.

#### 1. Reaction 1

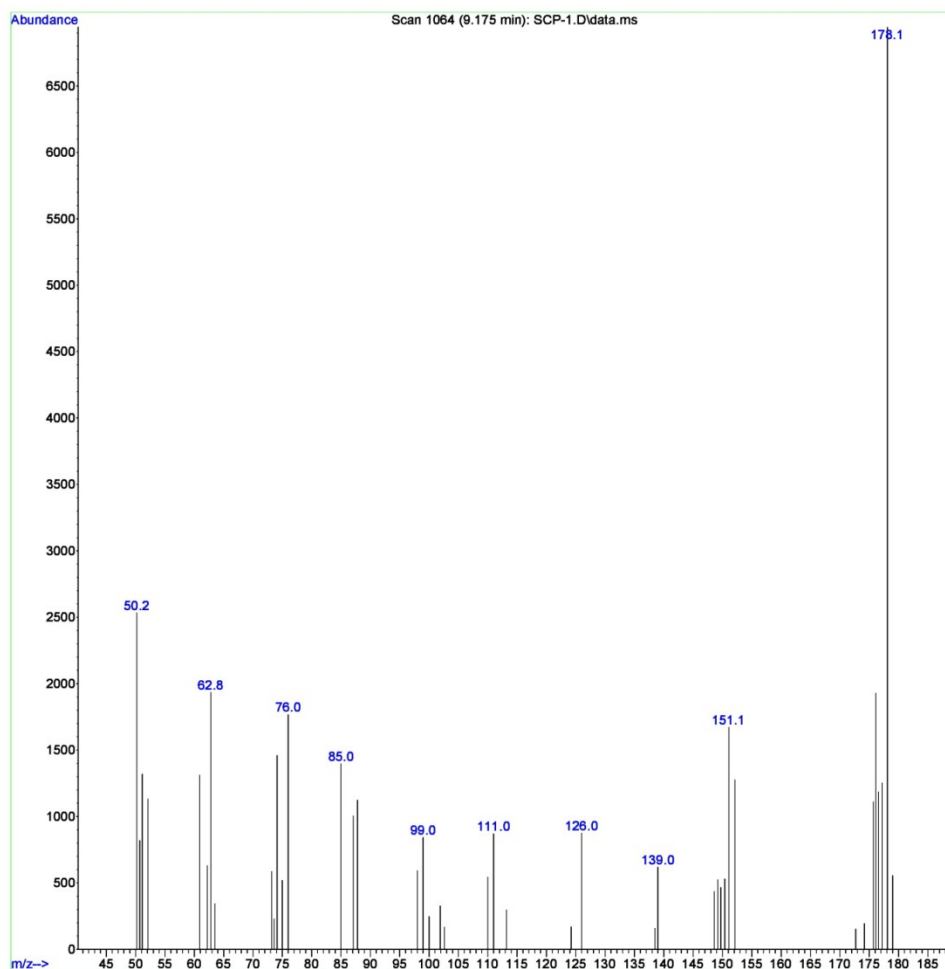

## 2. Reaction 2

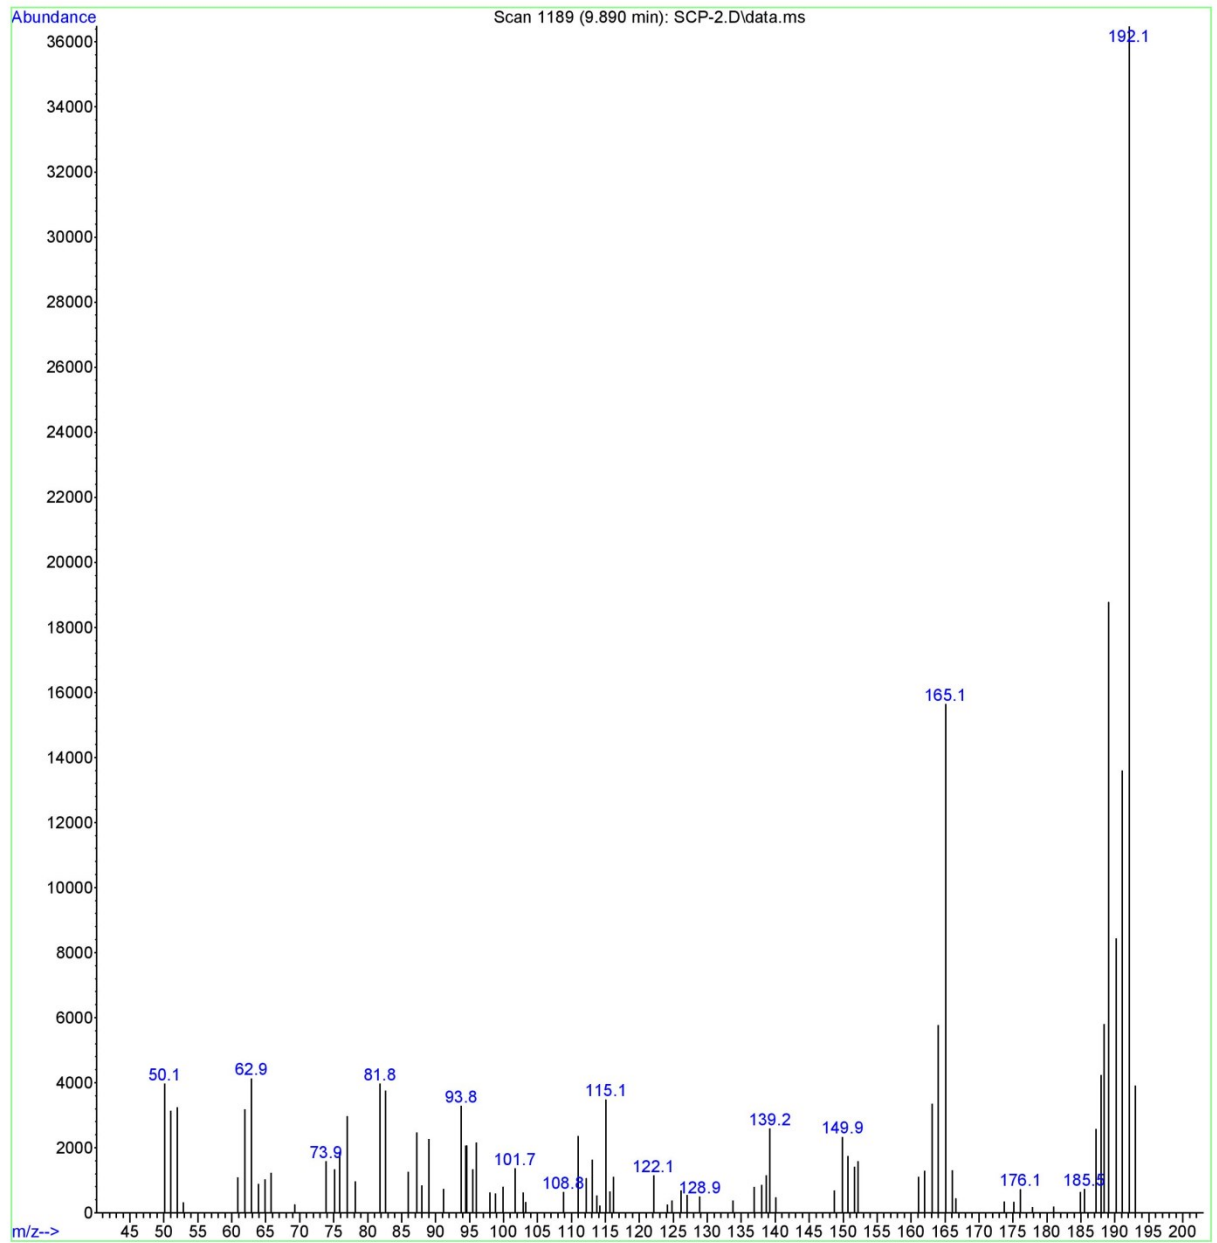

### 3. Reaction 3

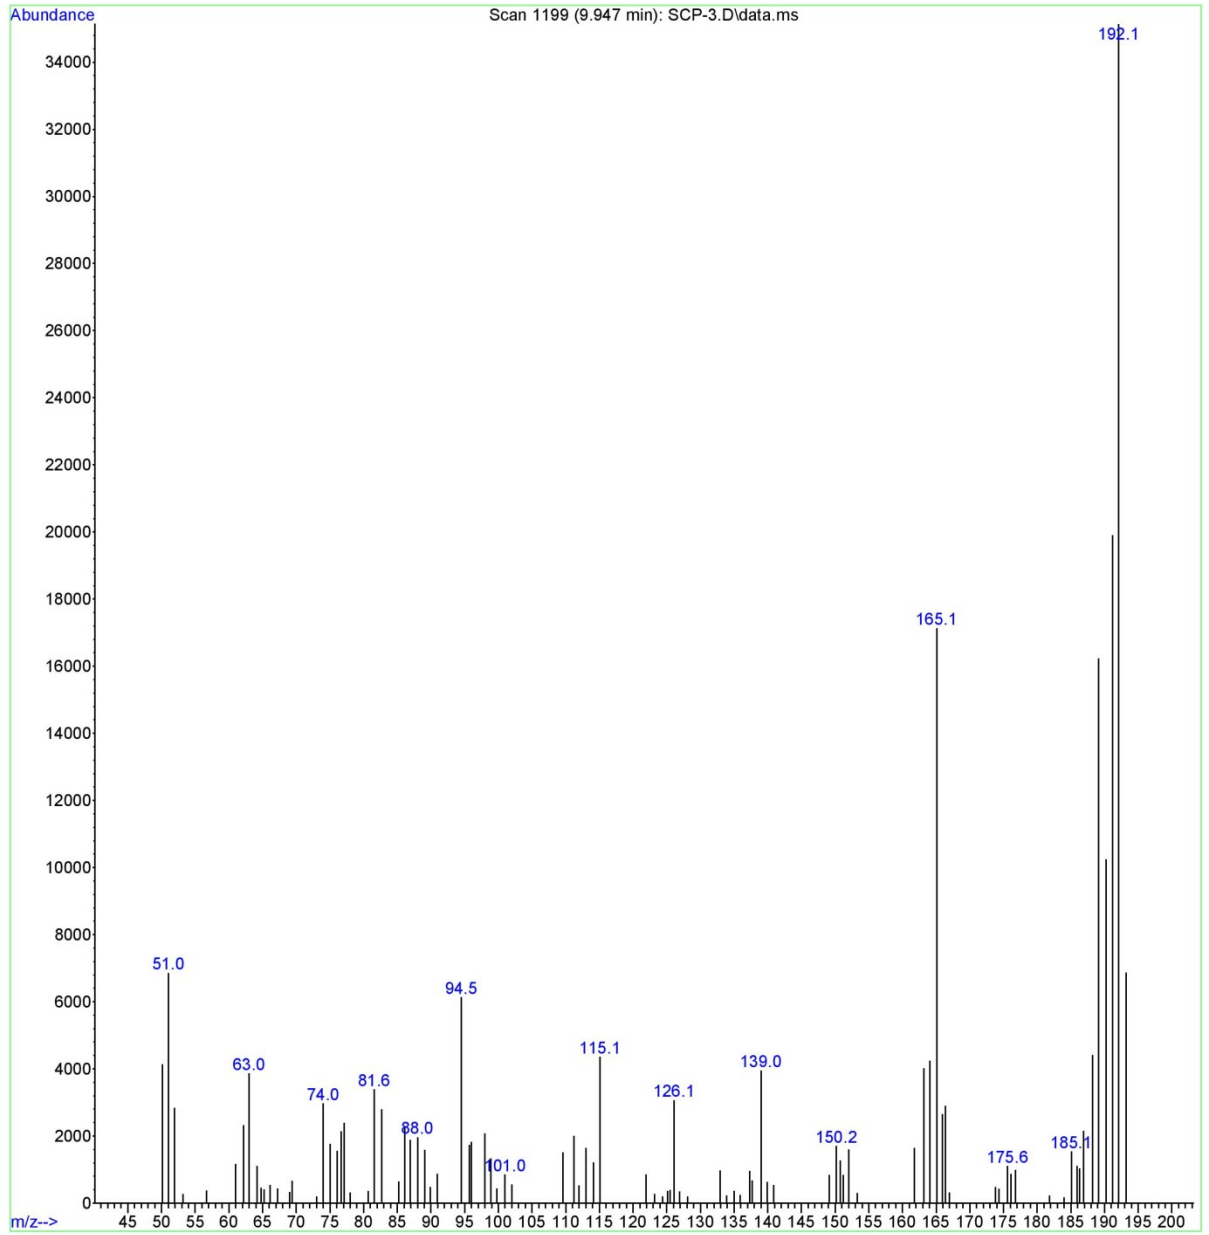

#### 4. Reaction 4

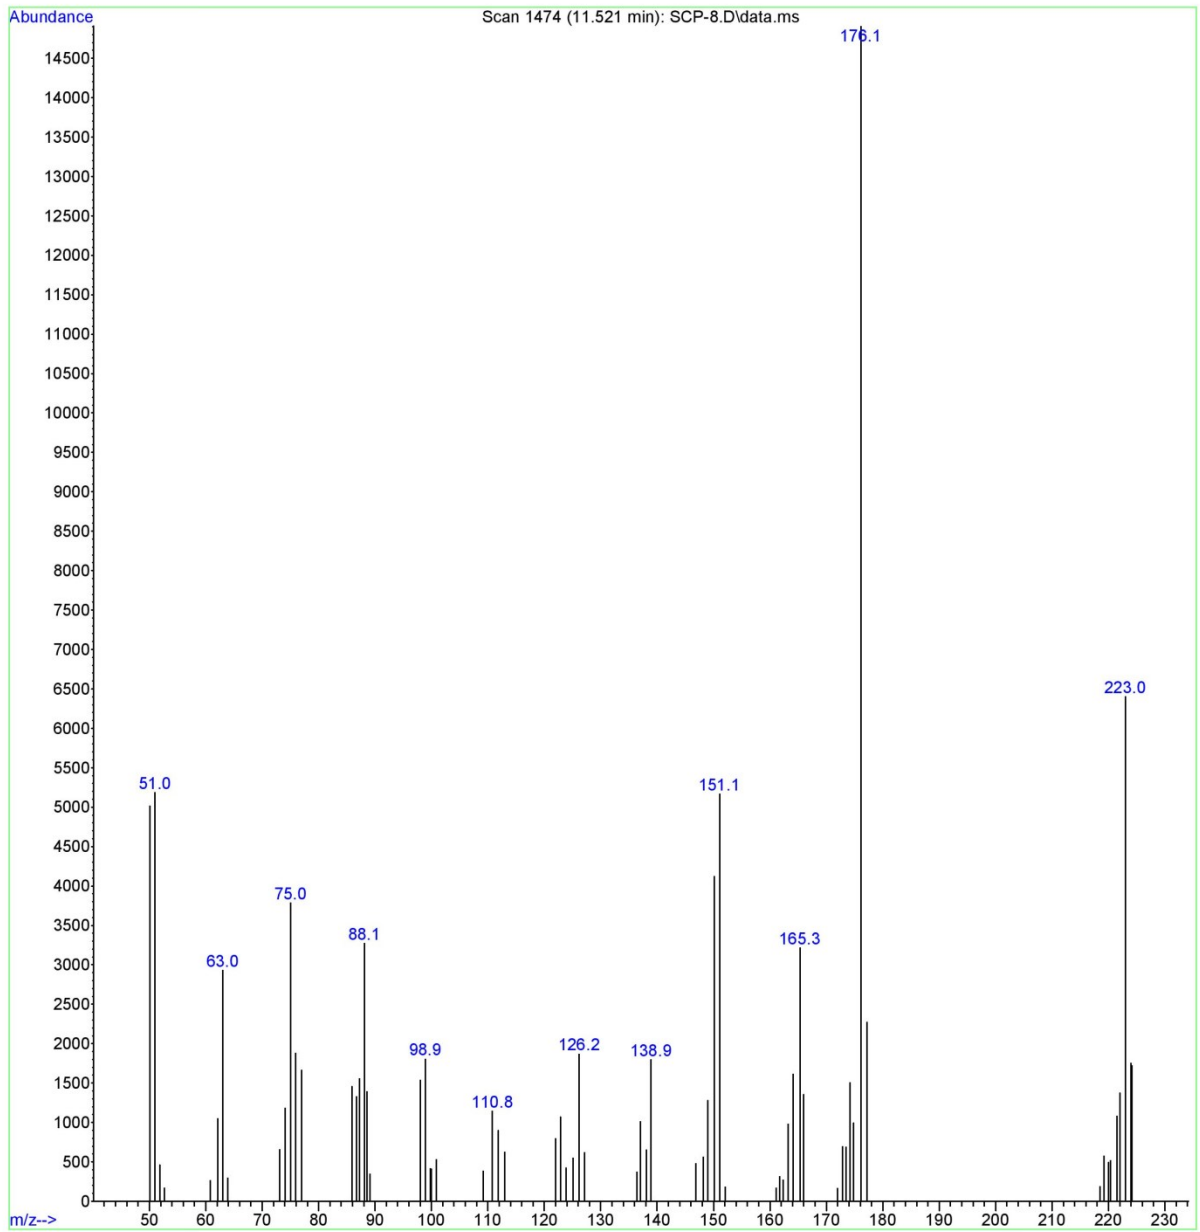

## 5. Reaction 5

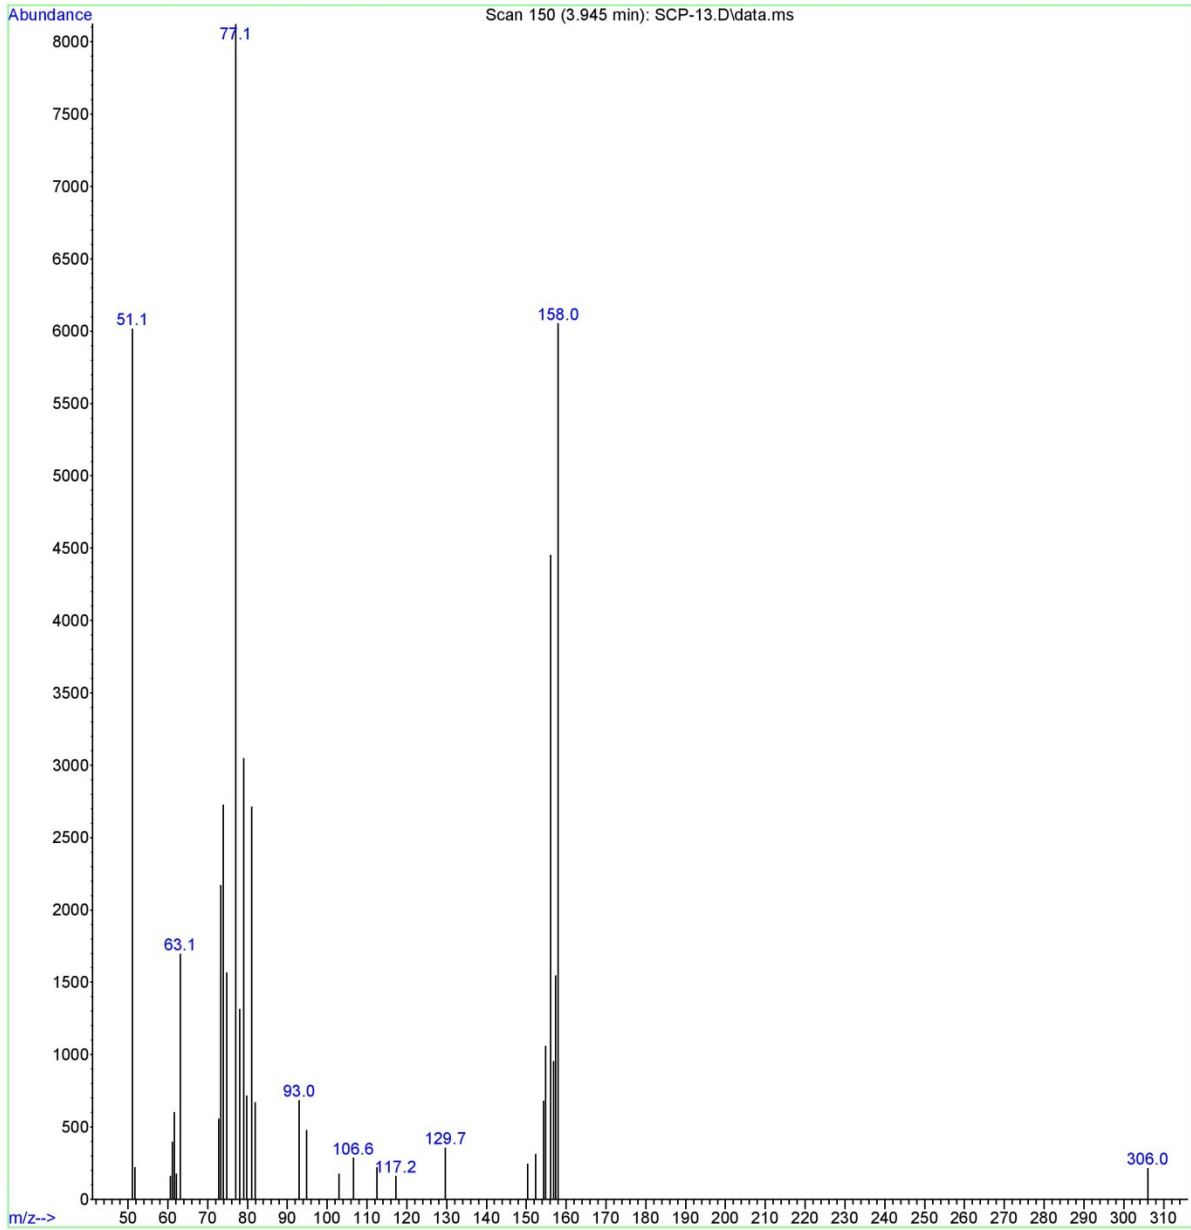

## 6. Reaction 6

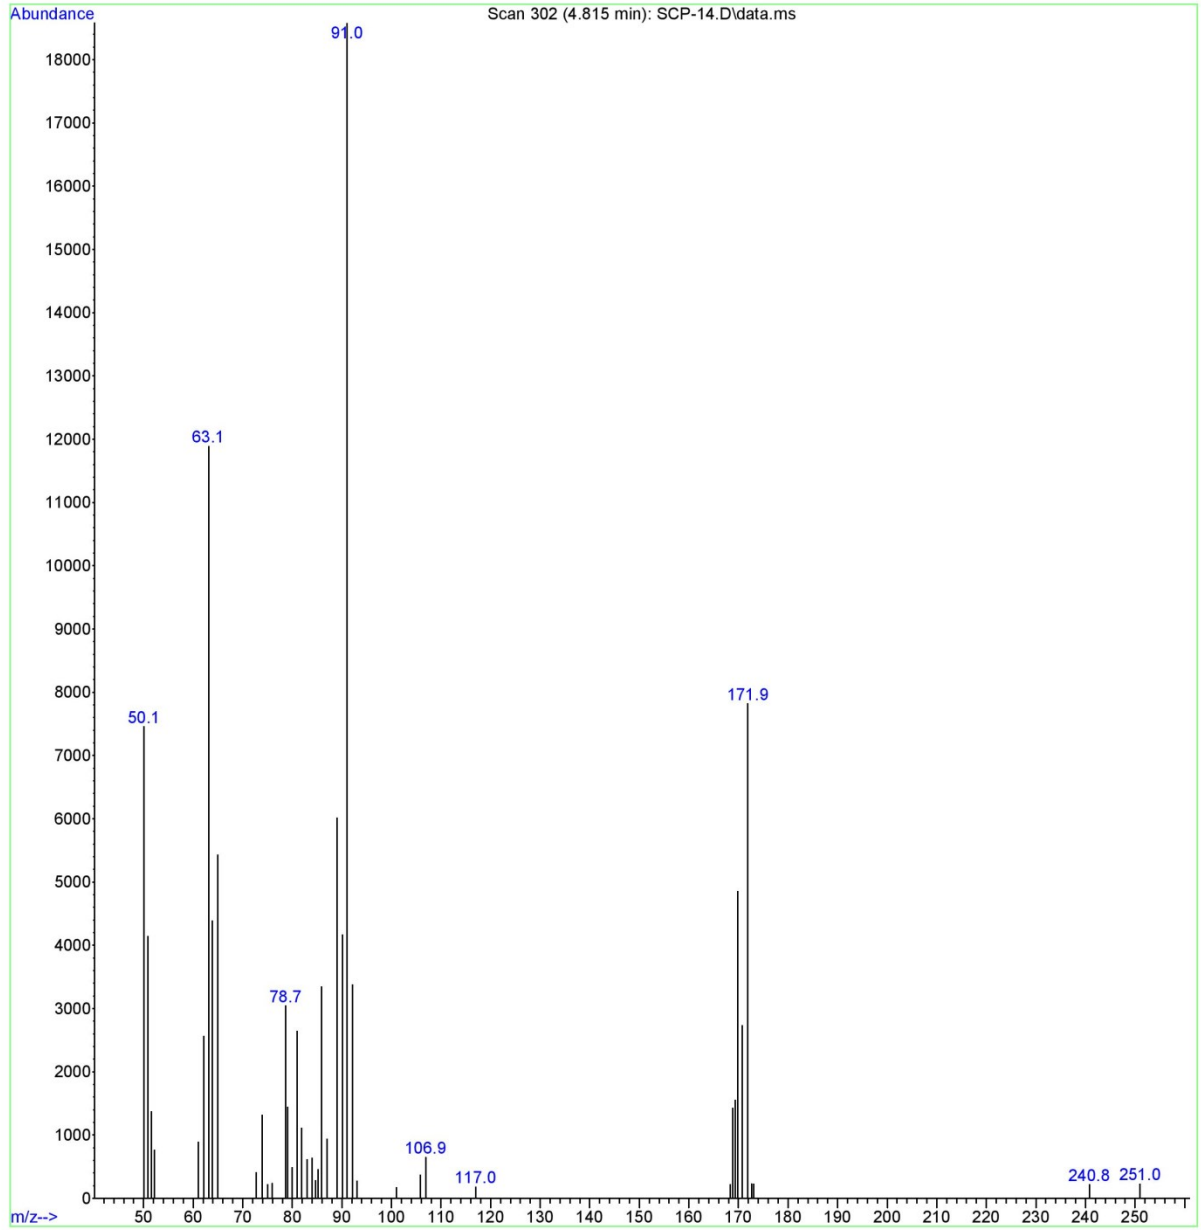

## 7. Reaction 7

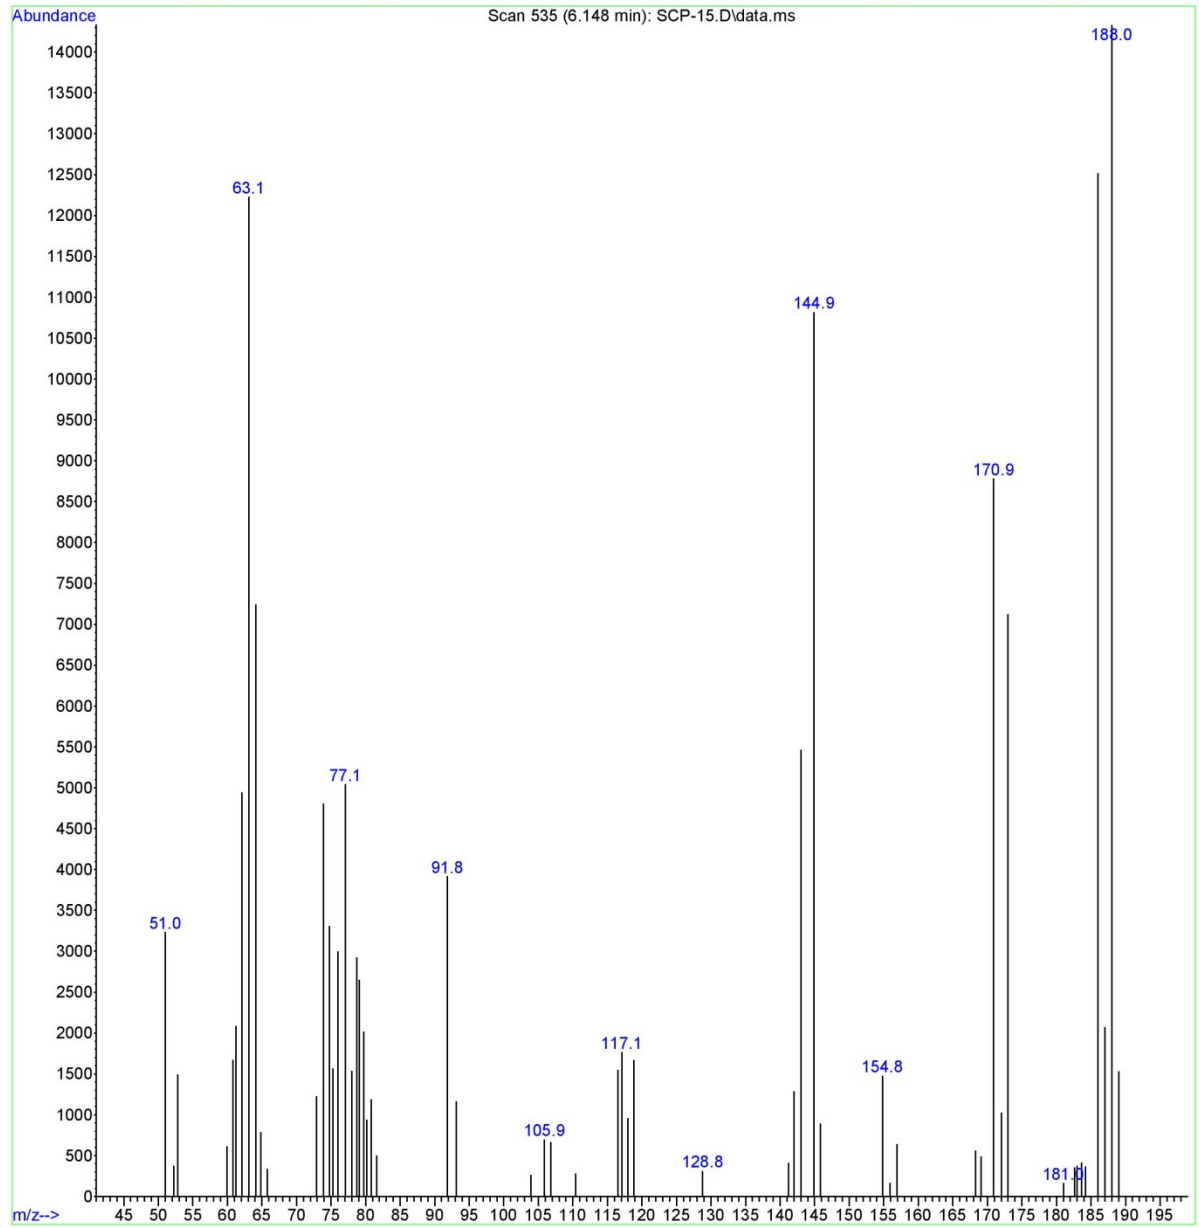

## 8. Reaction 8

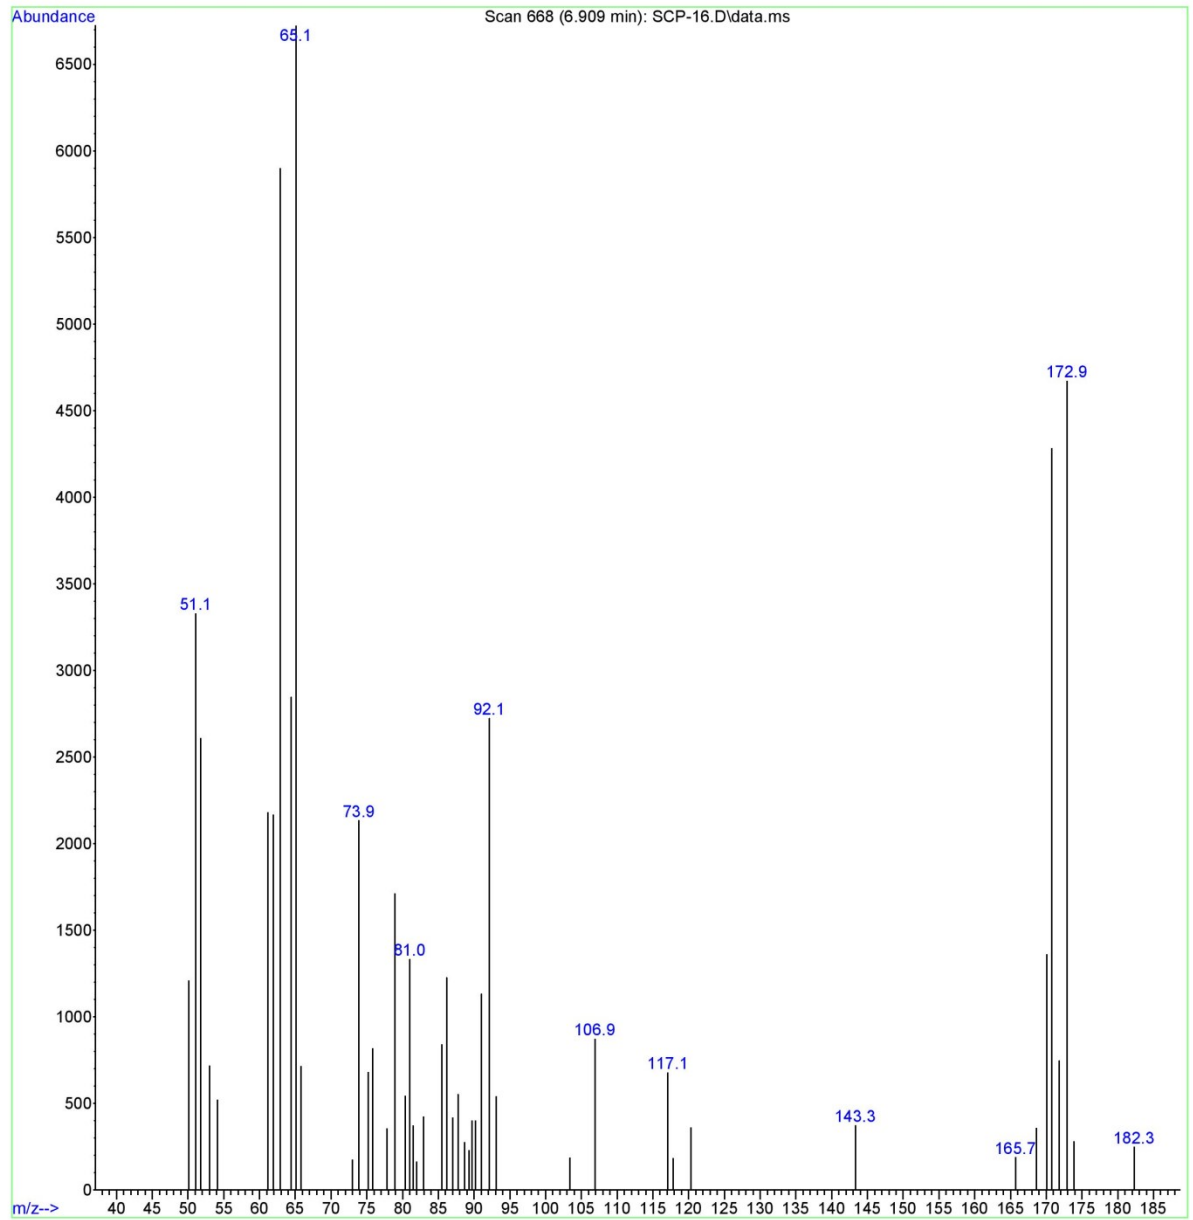



## 9. Reaction 9

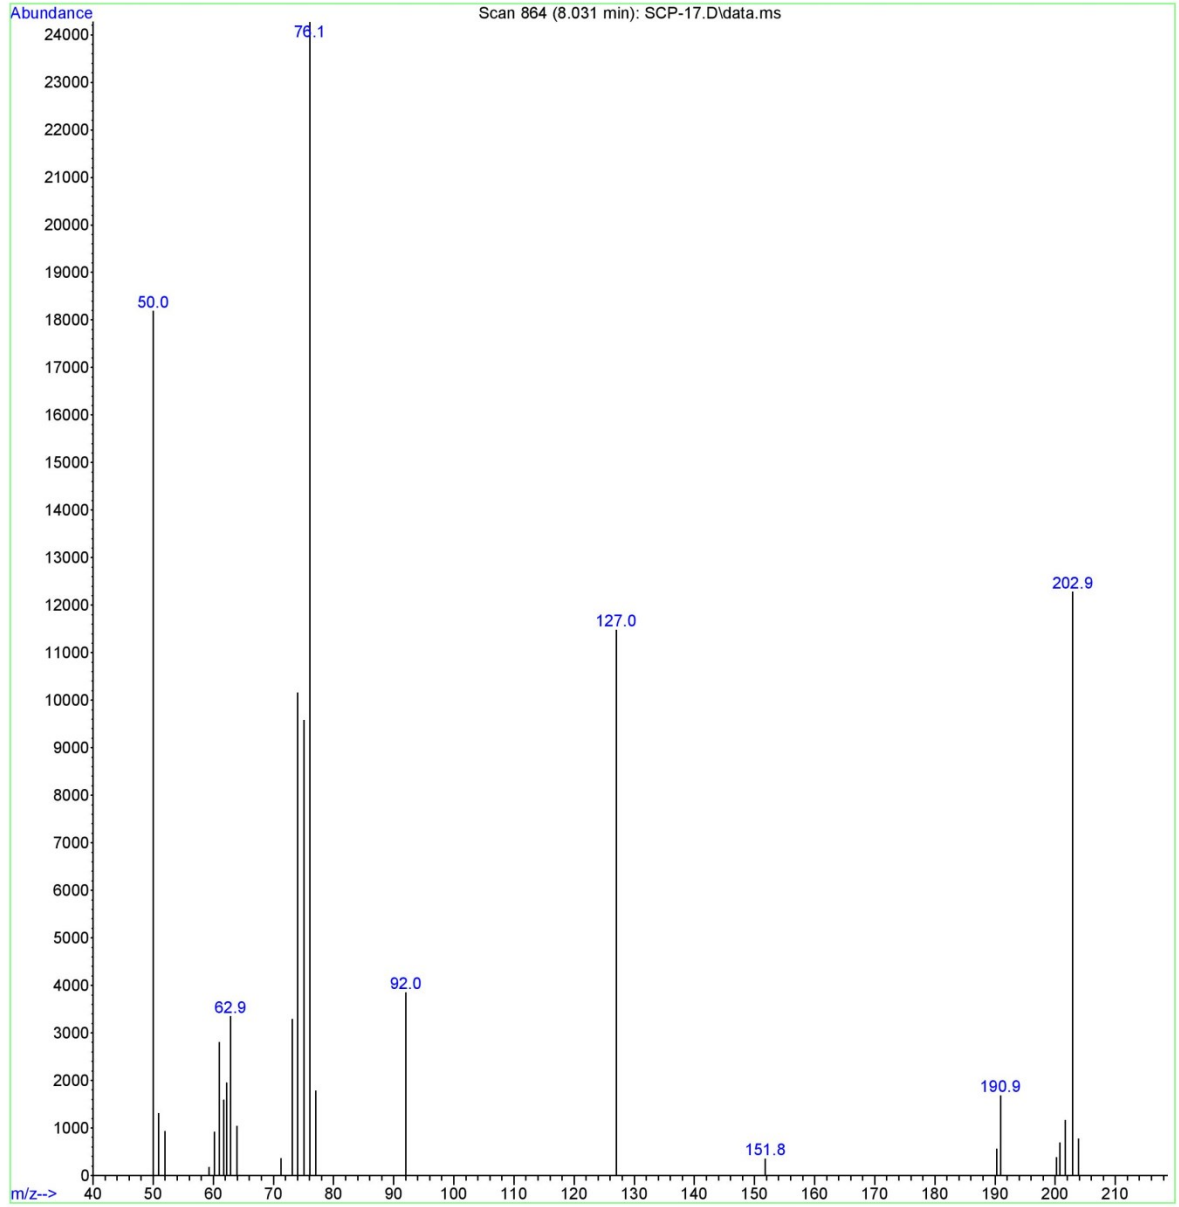

# 10. Reaction 10

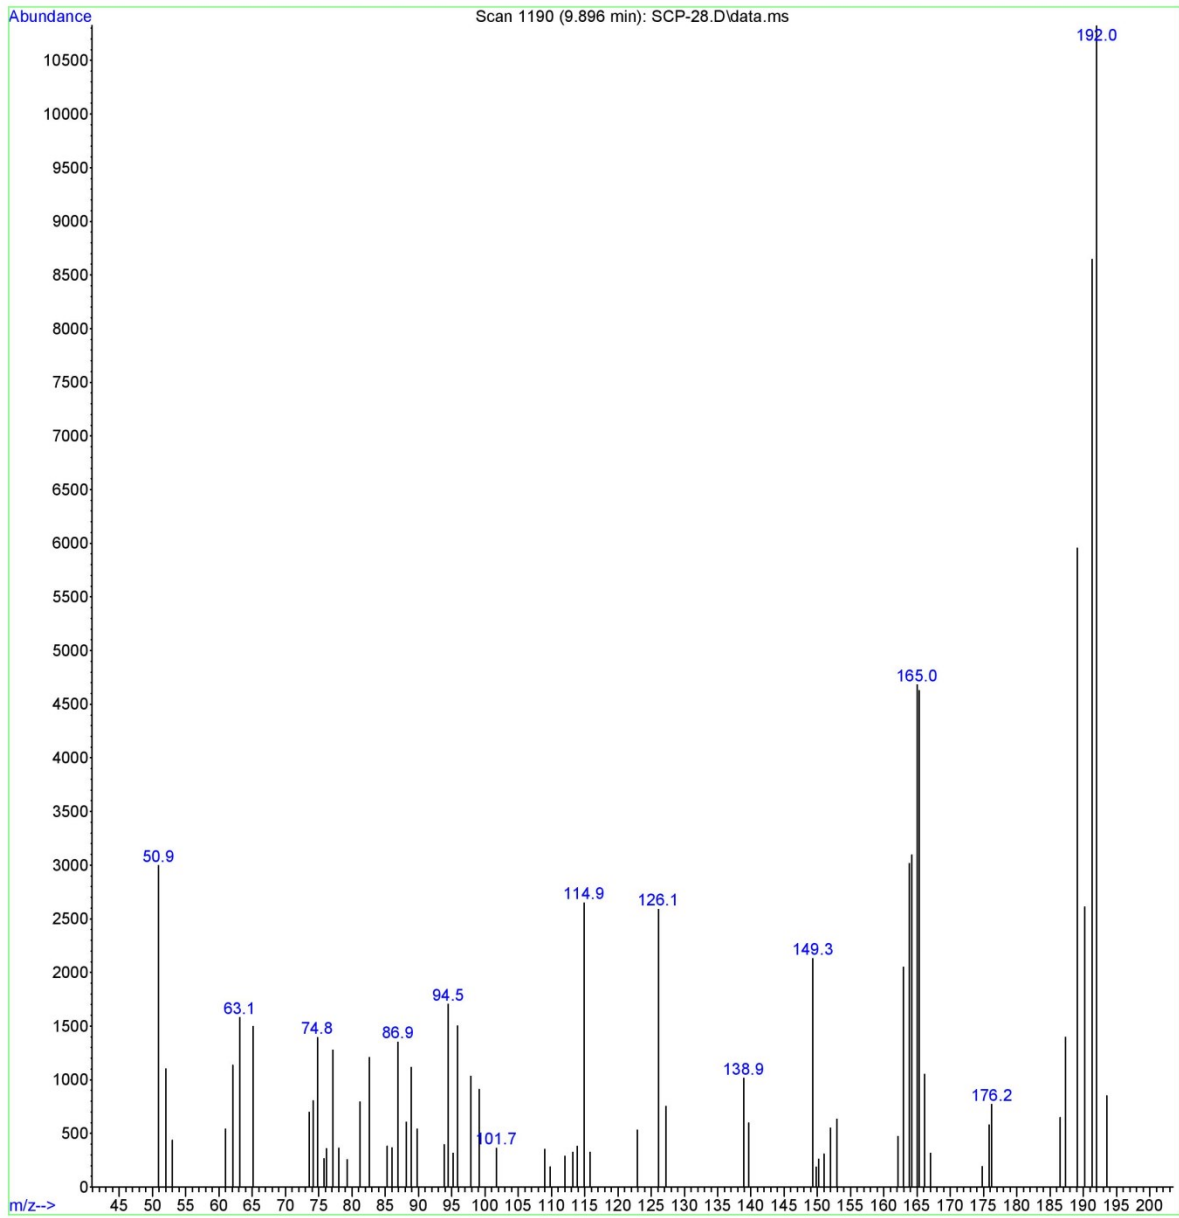

# 11. Reaction 11

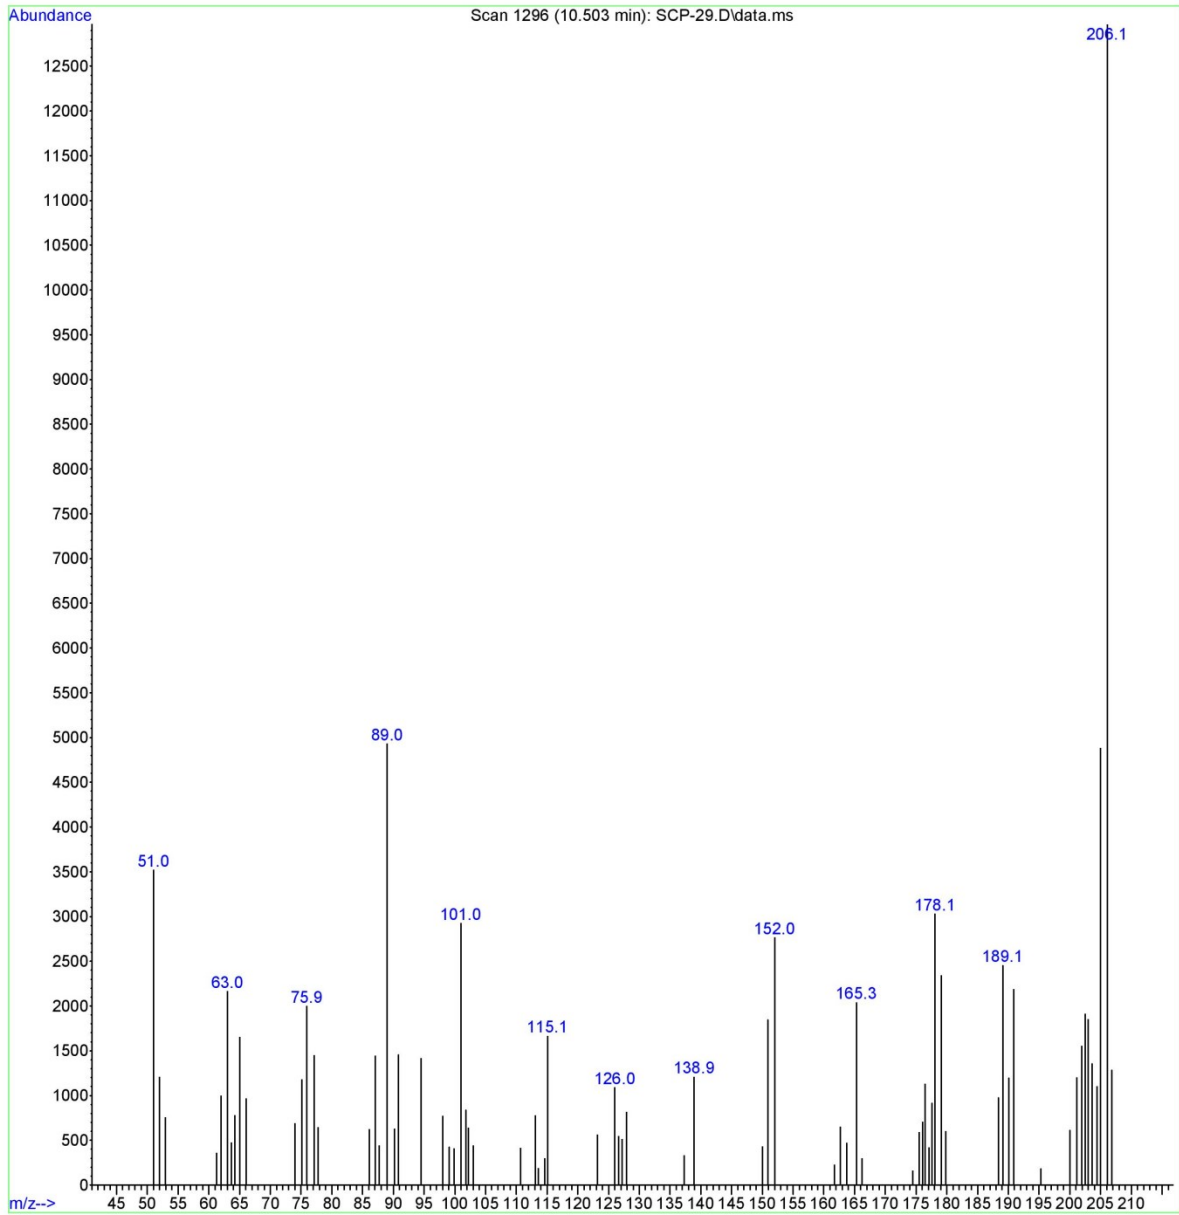

## 12. Reaction 12

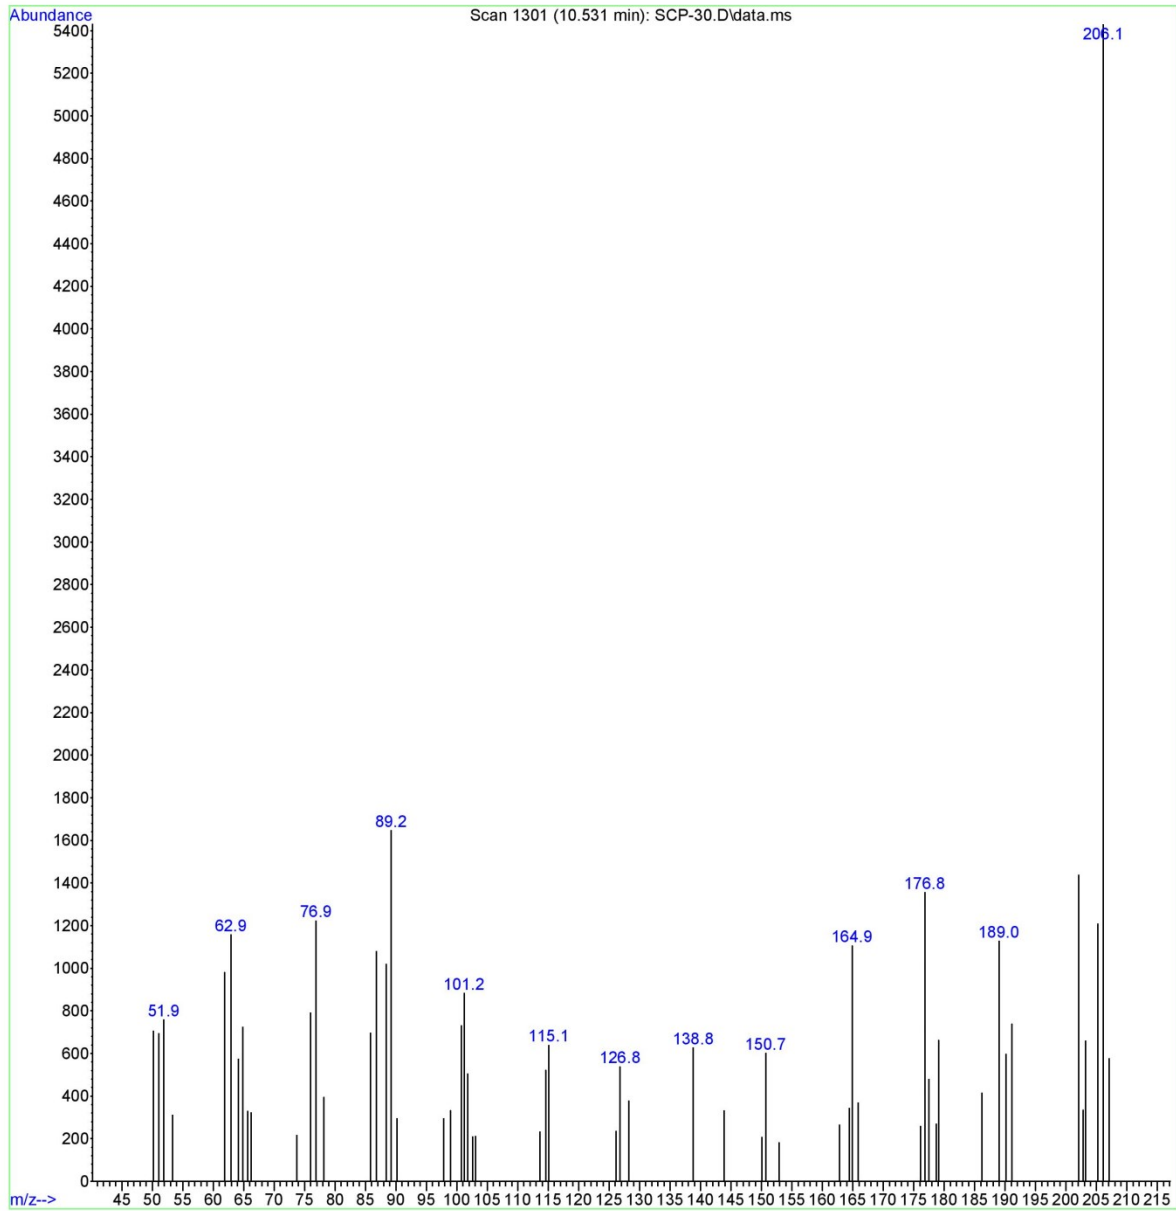

### 13. Reaction 13

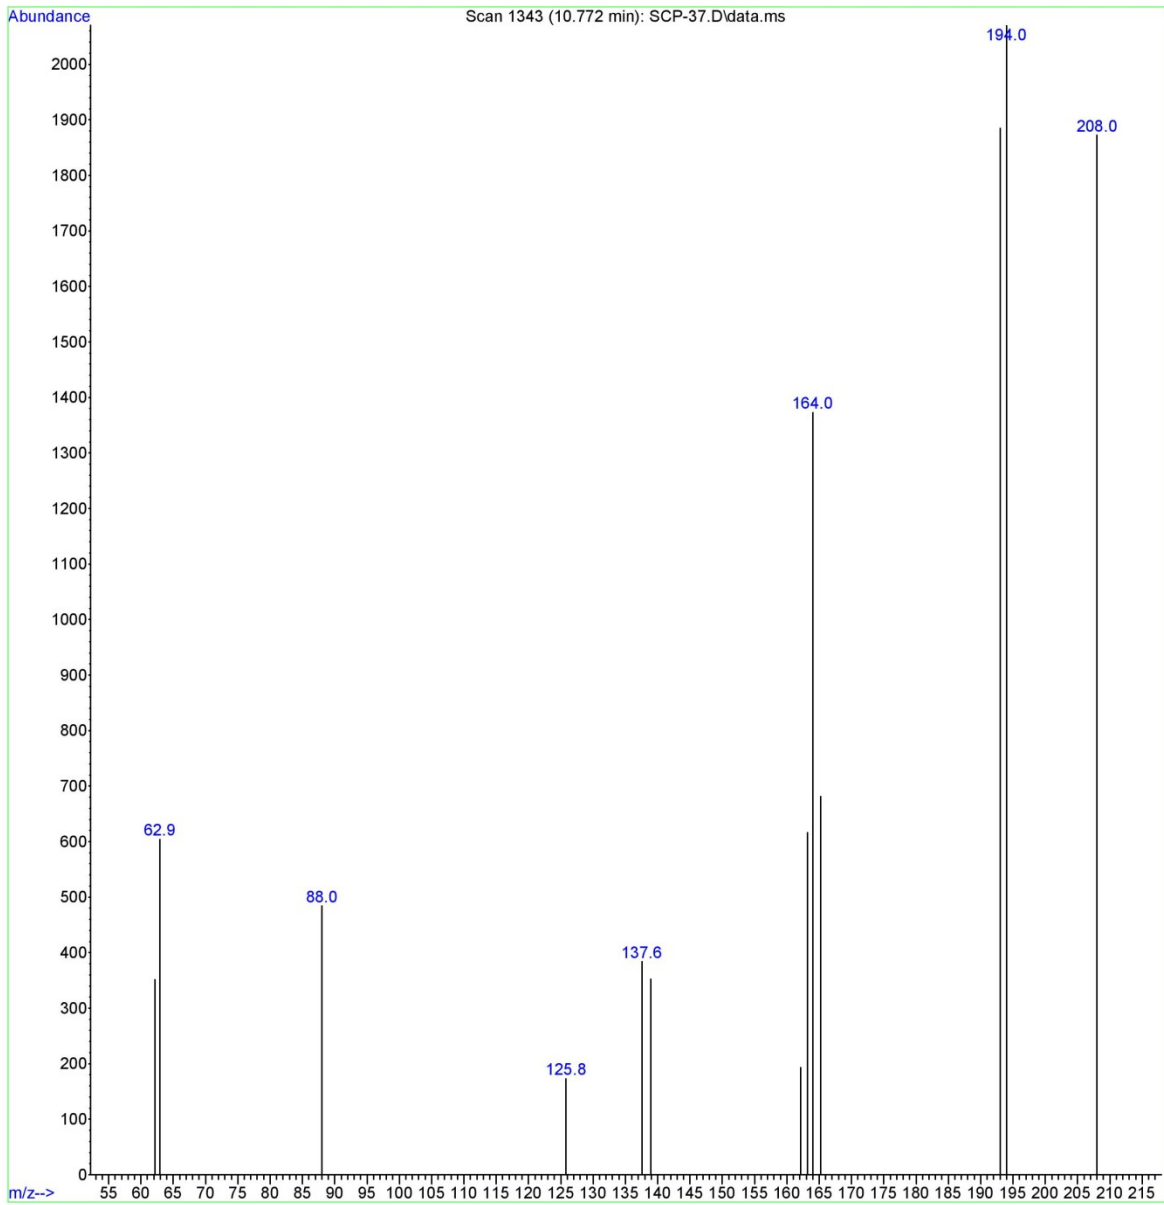

# 14. Reaction 14

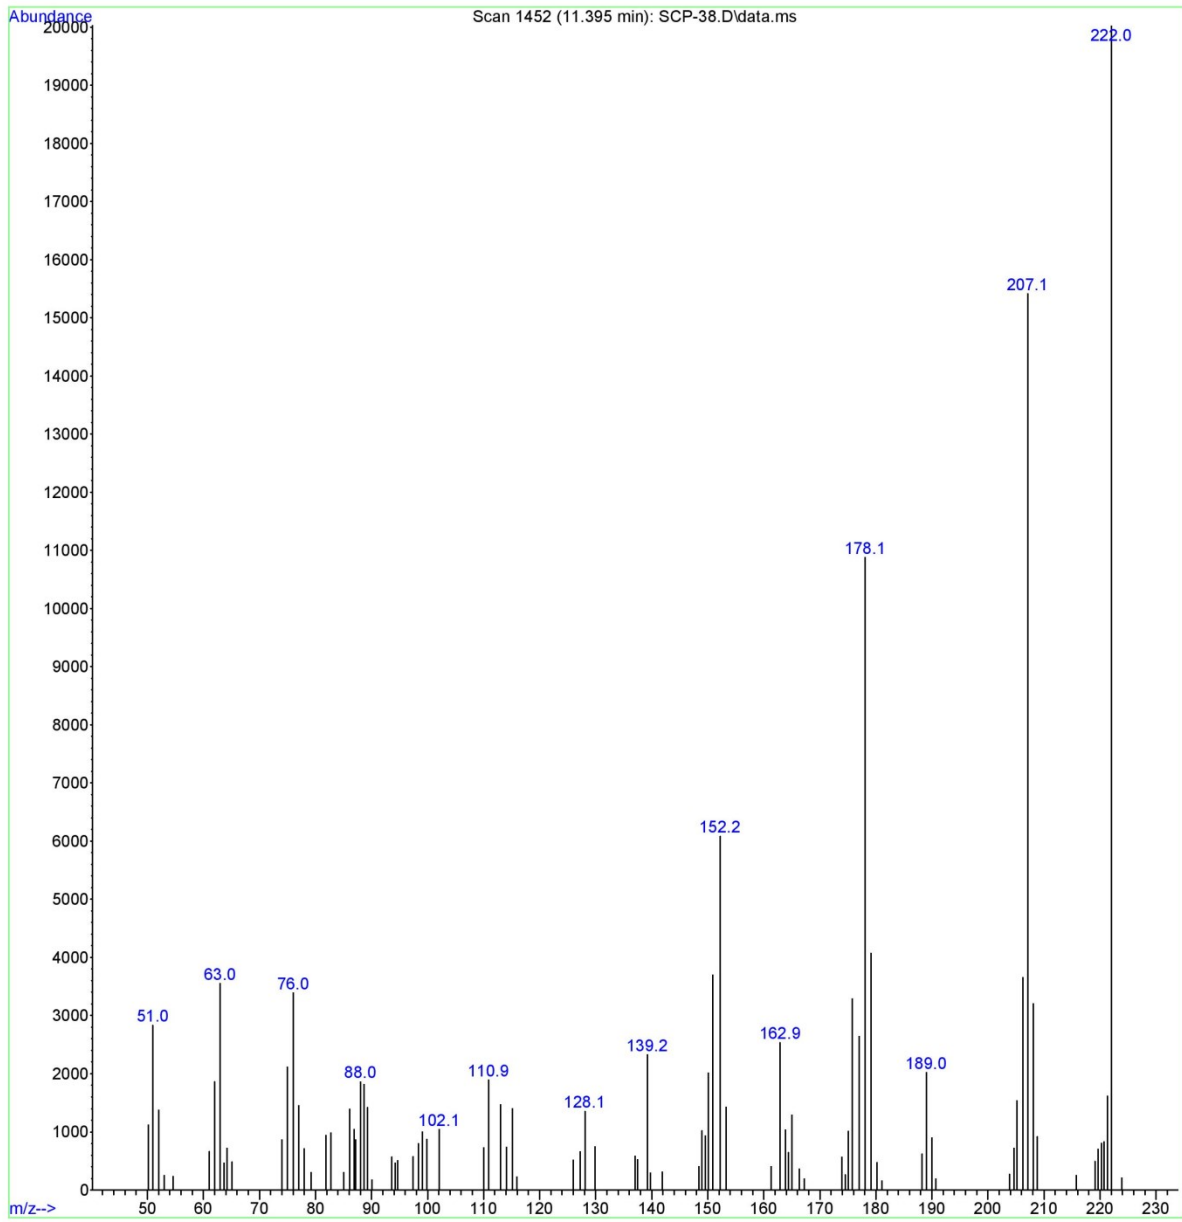

# 15. Reaction 15

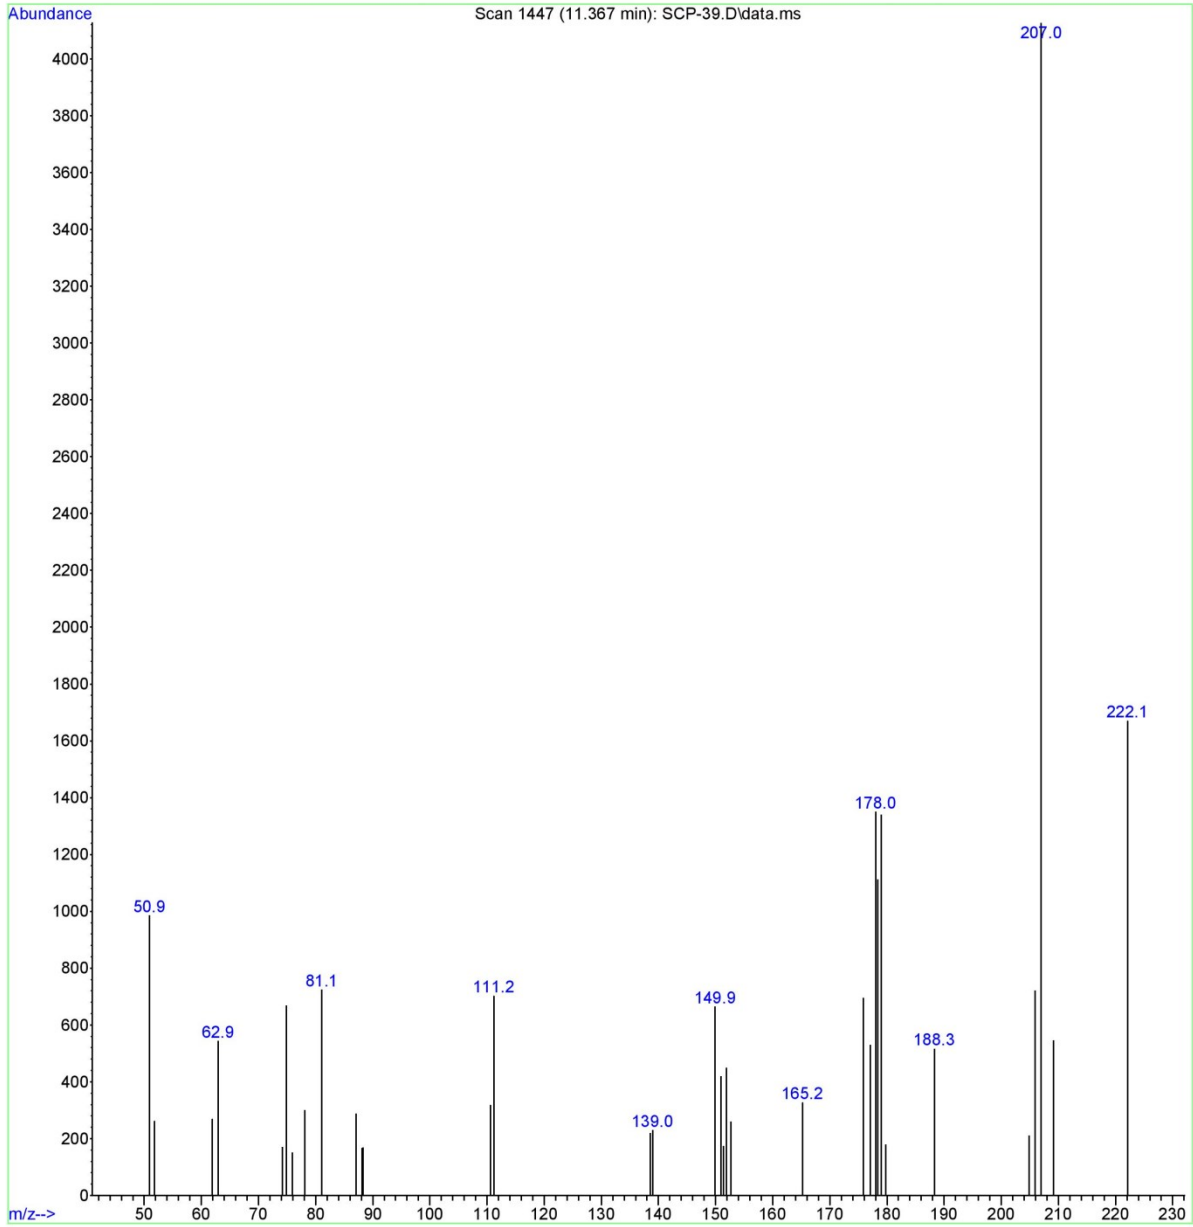

# 16. Reaction 16

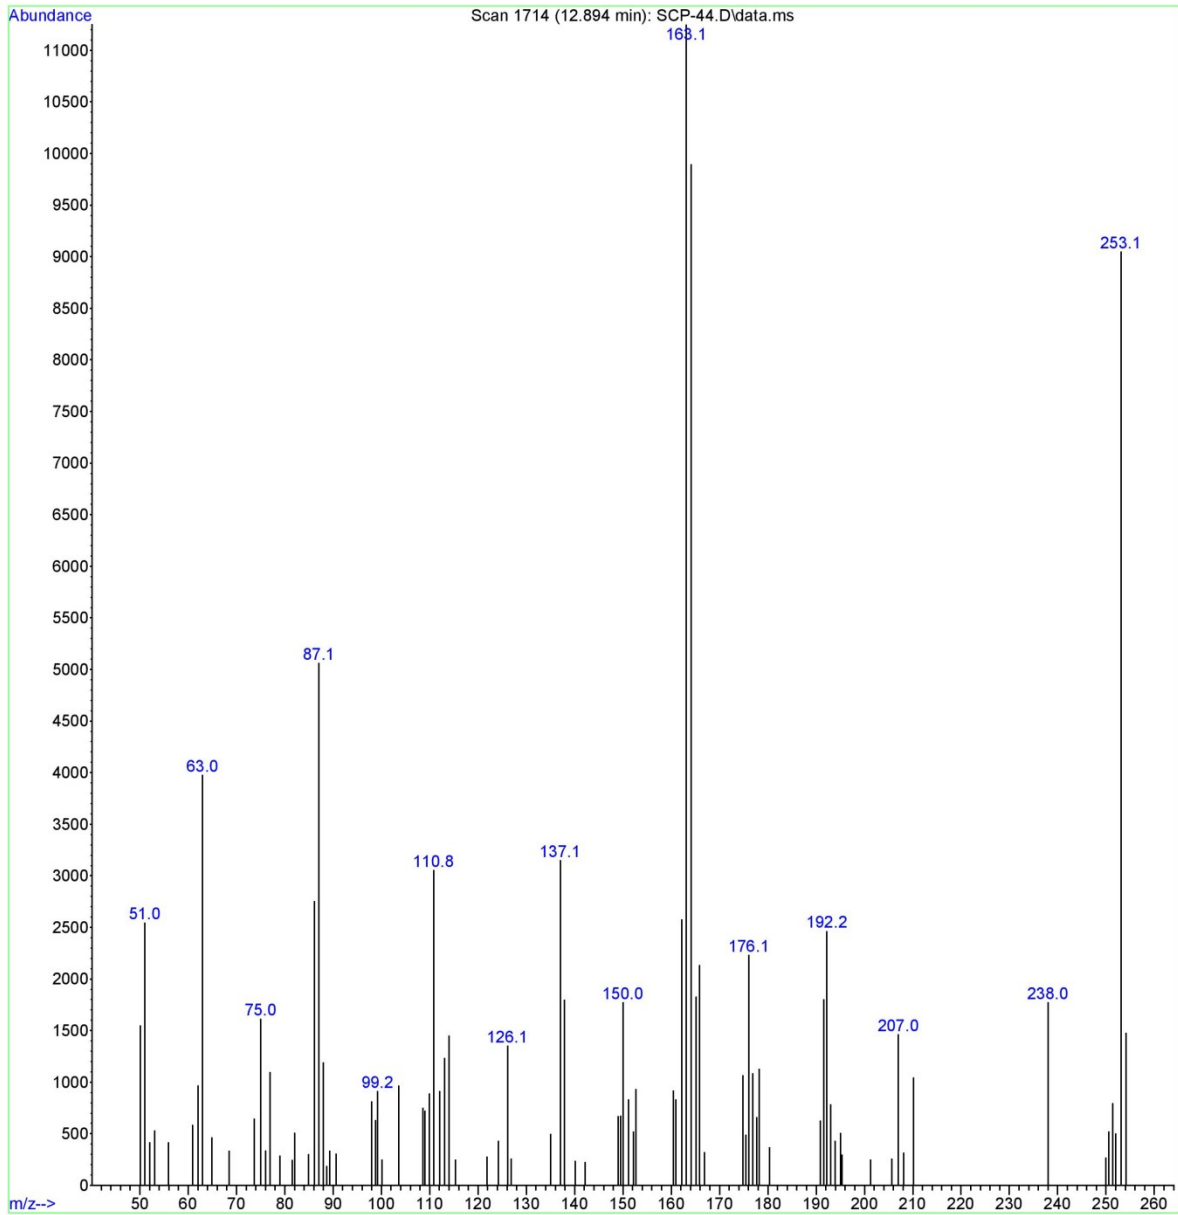



# 17. Reaction 17

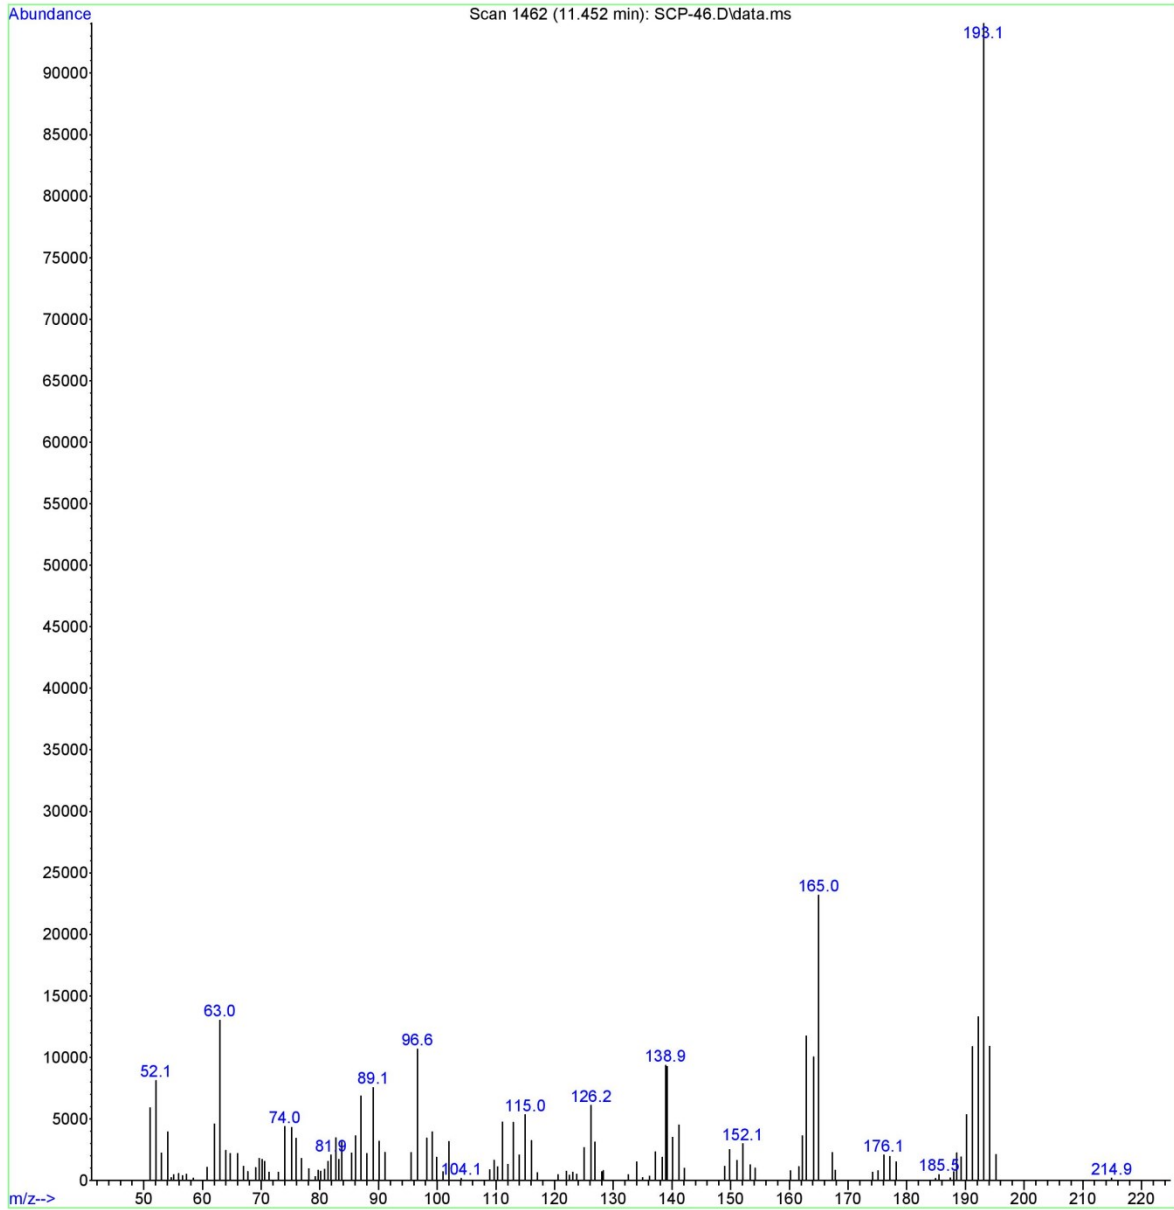

# 18. Reaction 18

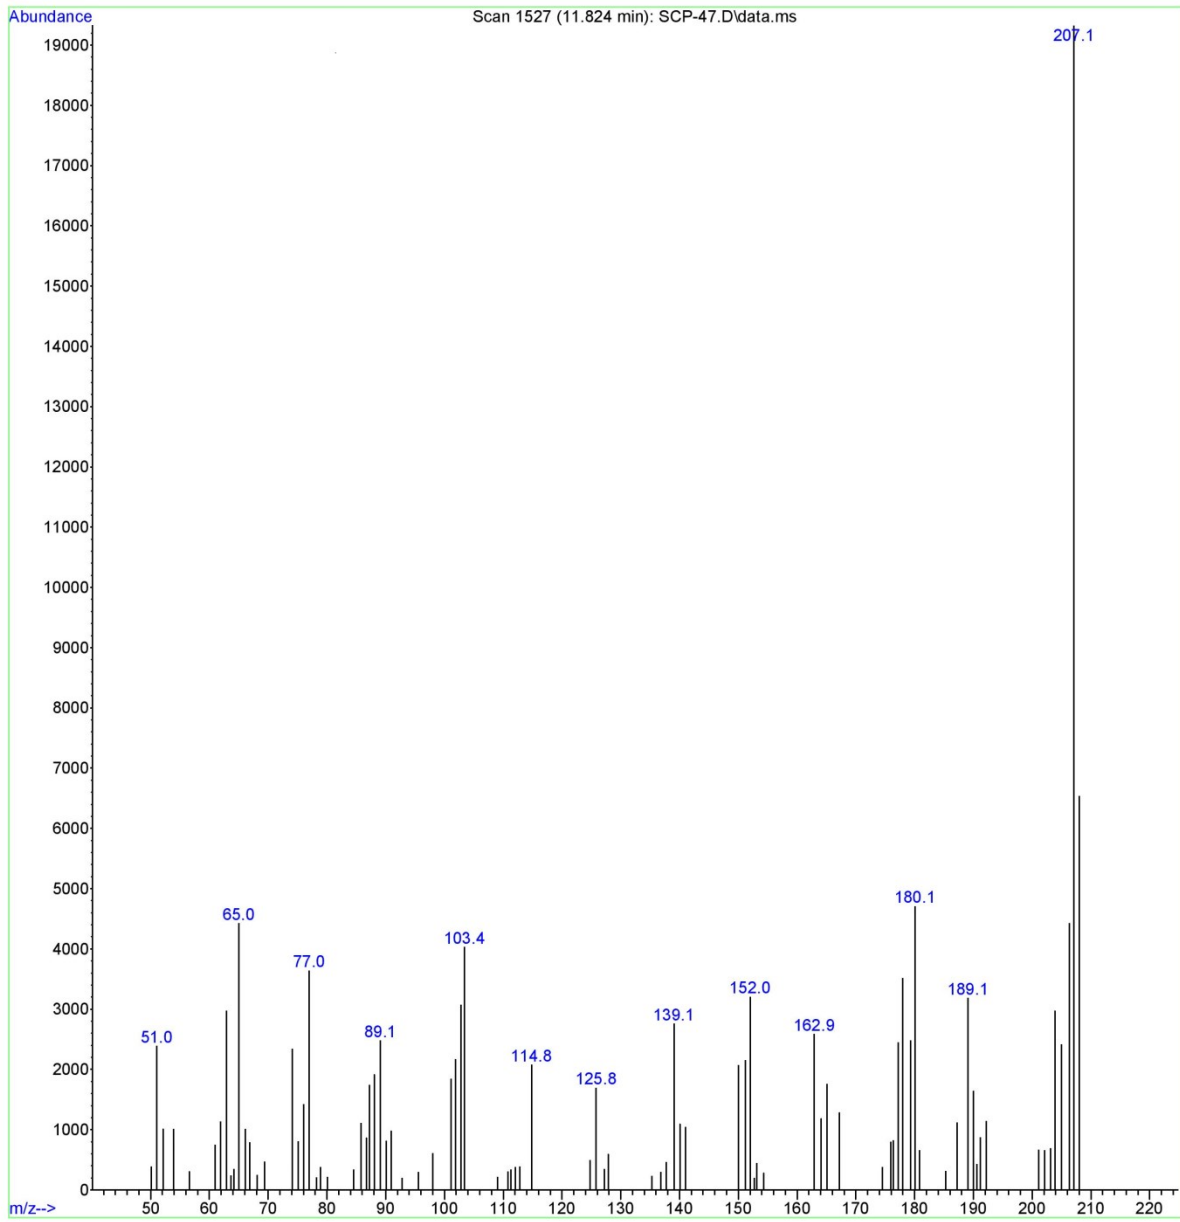

# 19. Reaction 19

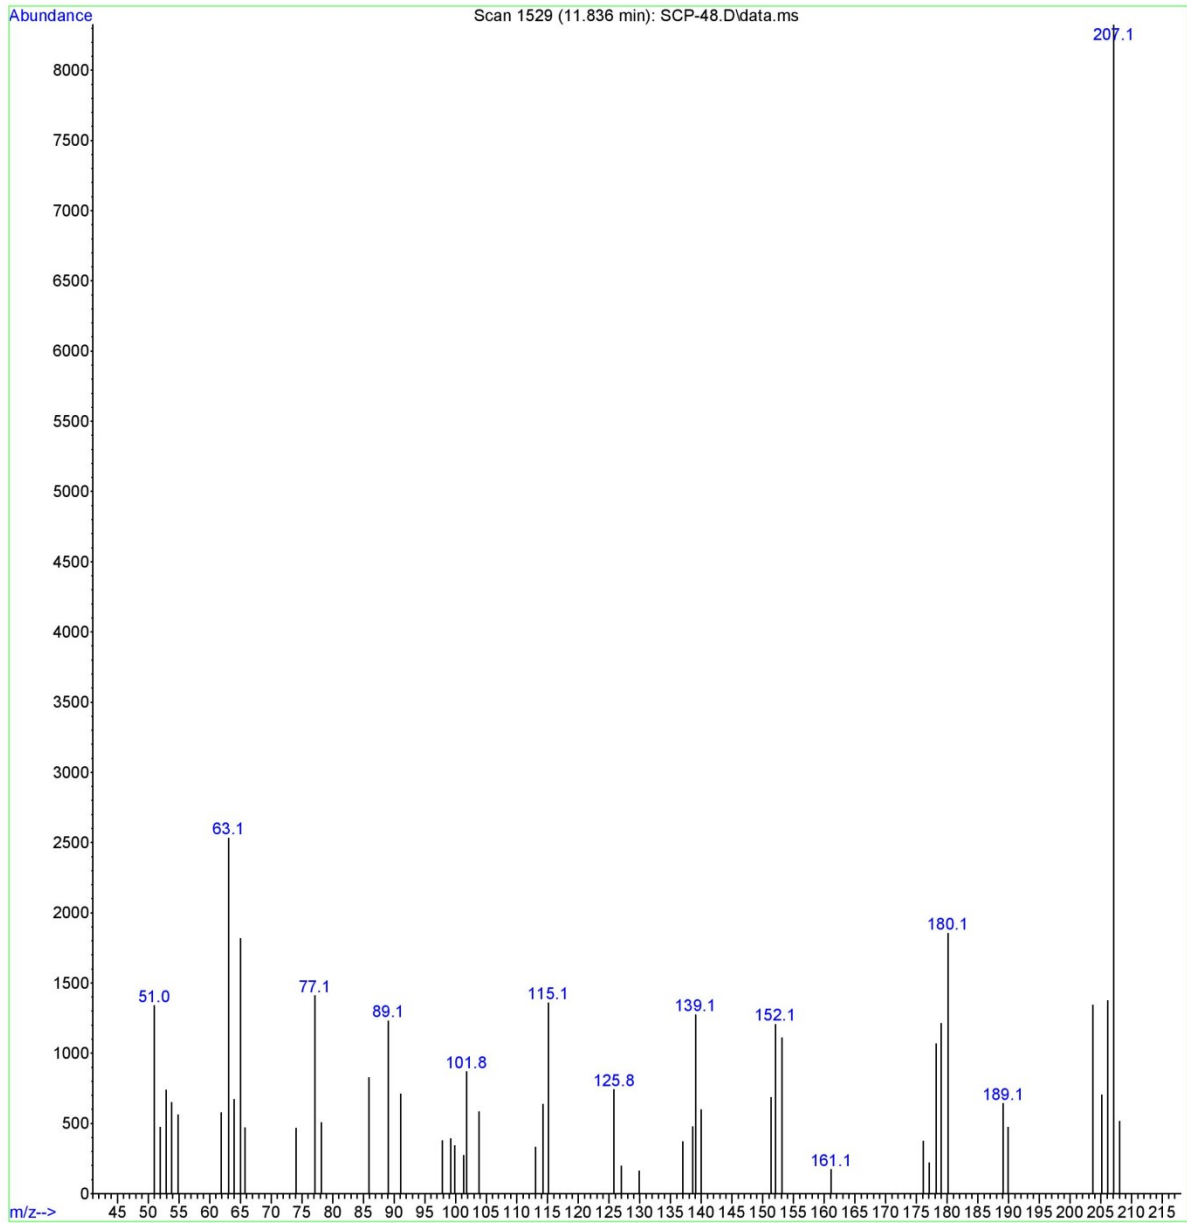

# <sup>1</sup>H NMR of the products of reaction

## 1. Reaction 1

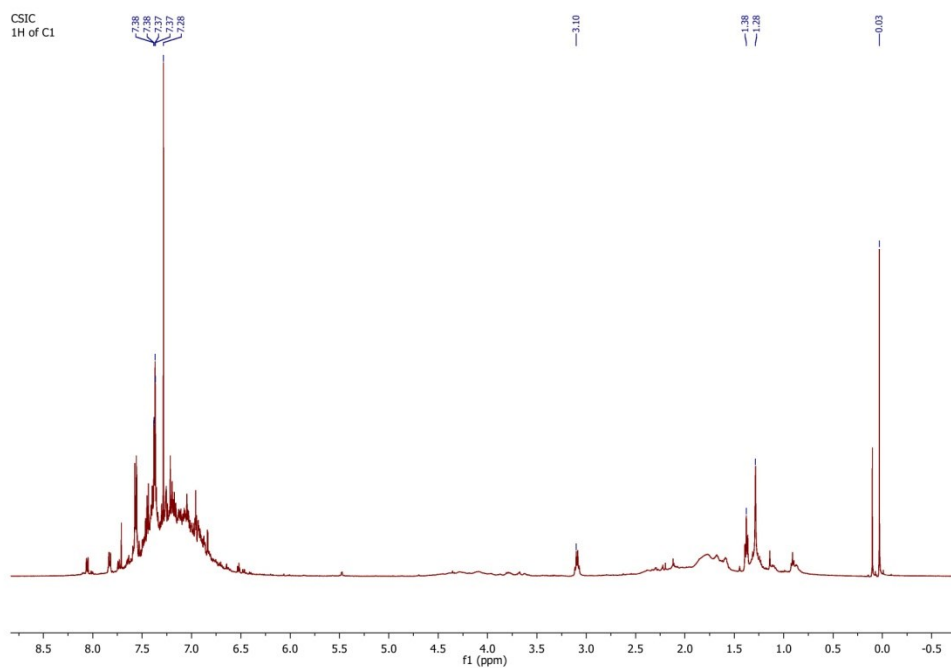

## 2. Reaction 2

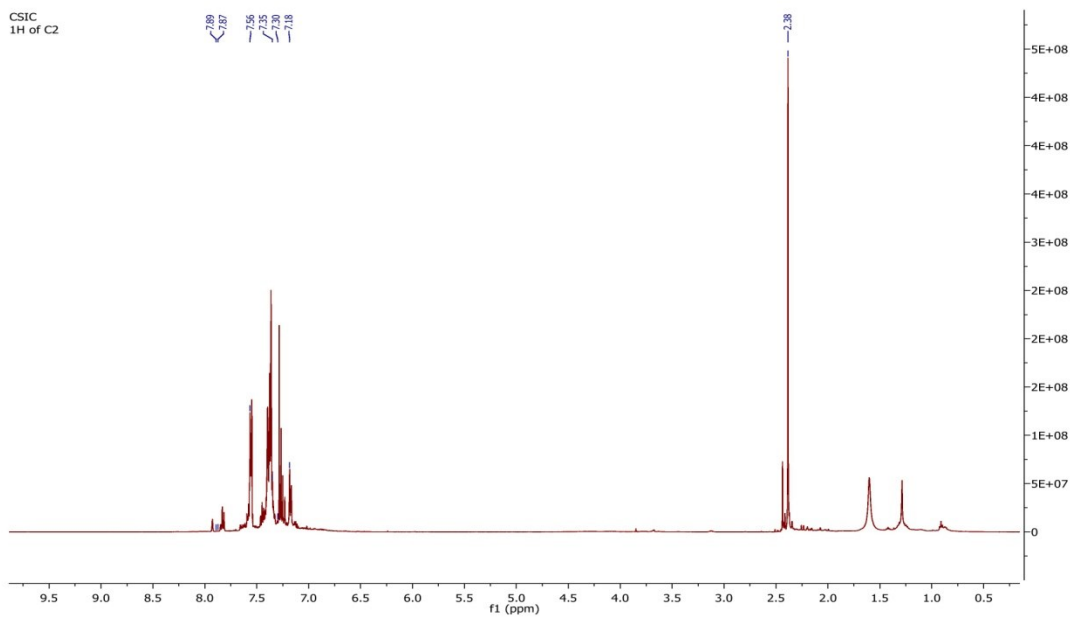

### 3. Reaction 3

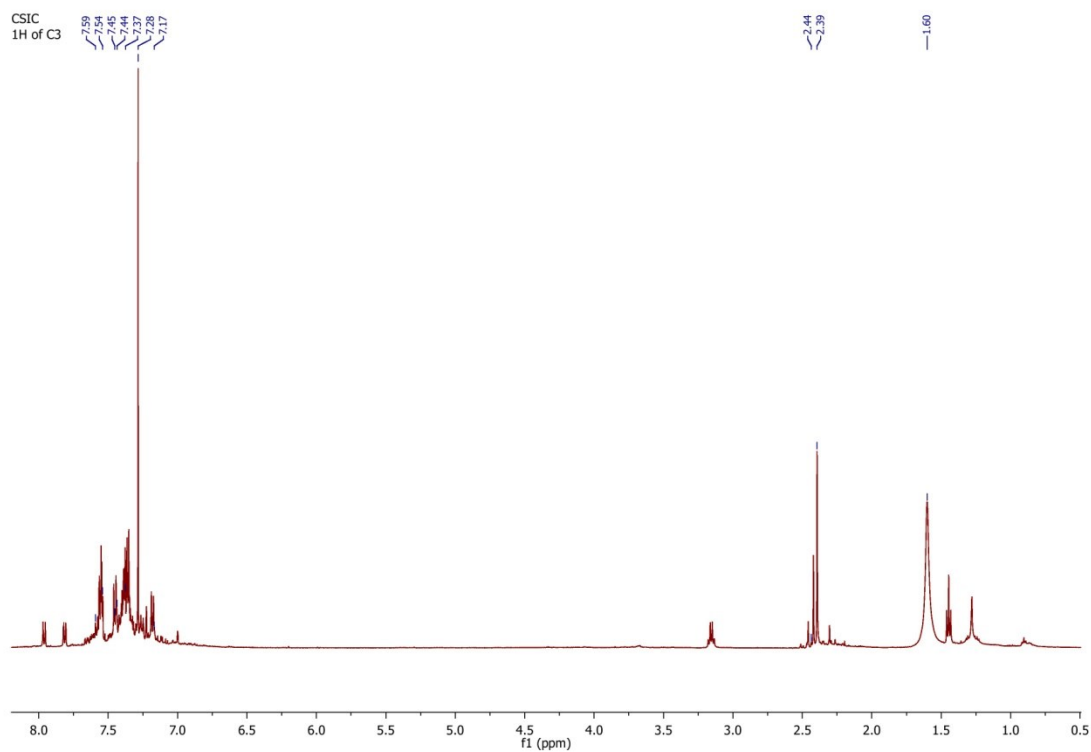

### 4. Reaction 4

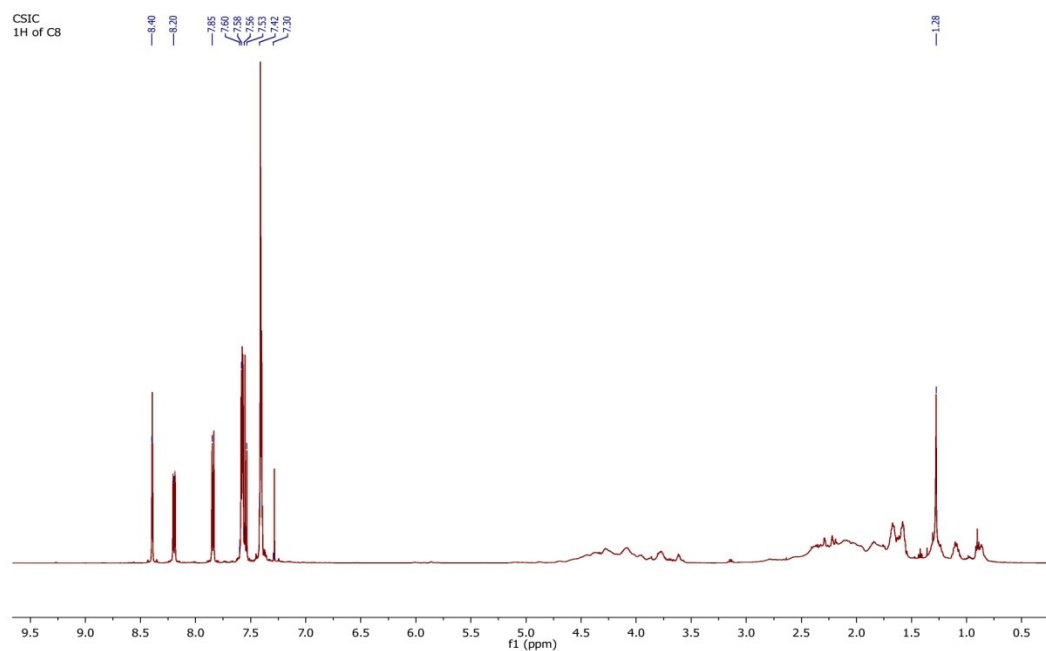

## 5. Reaction 5

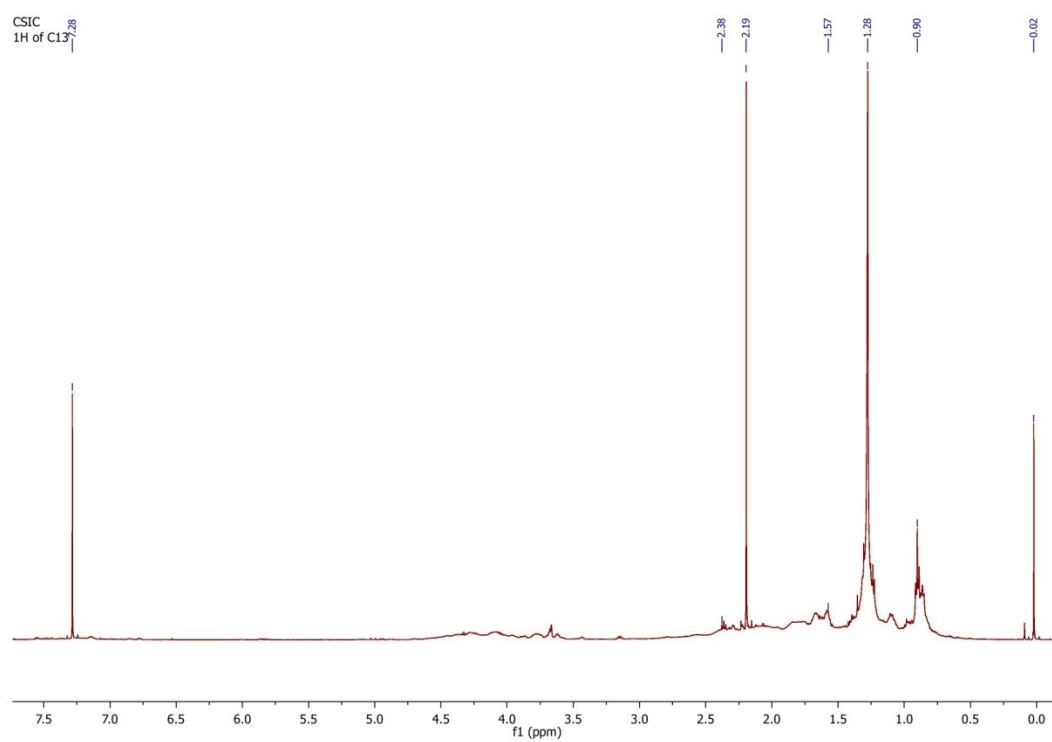

## 6. Reaction 6

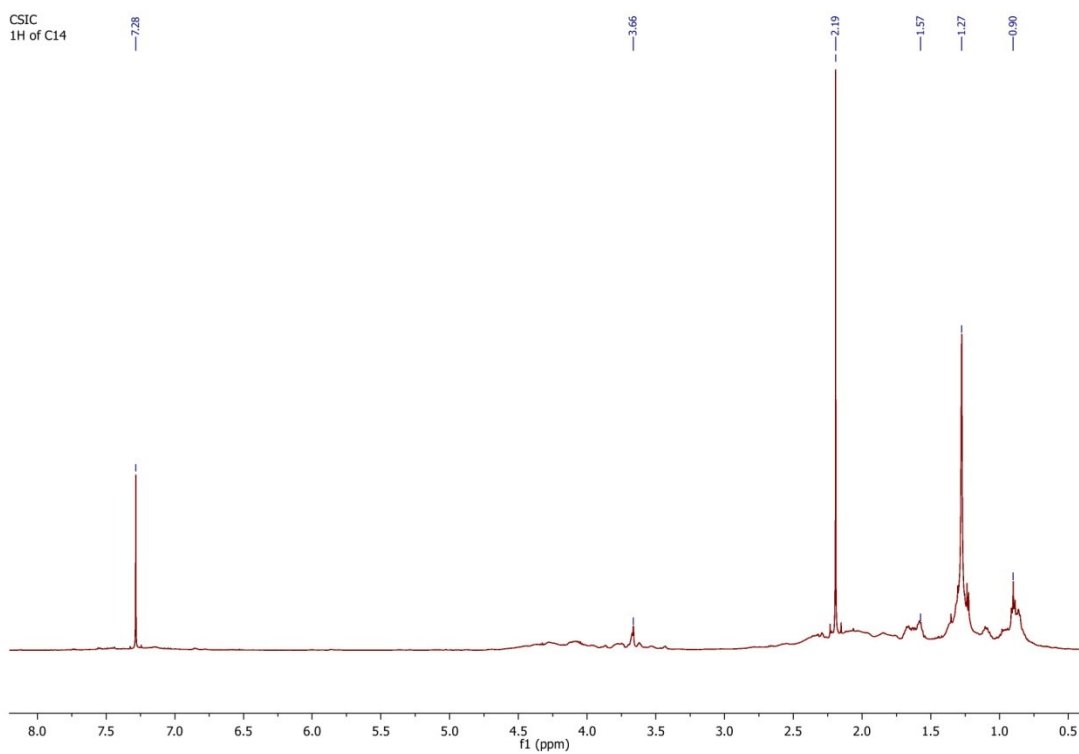

## 7. Reaction 7

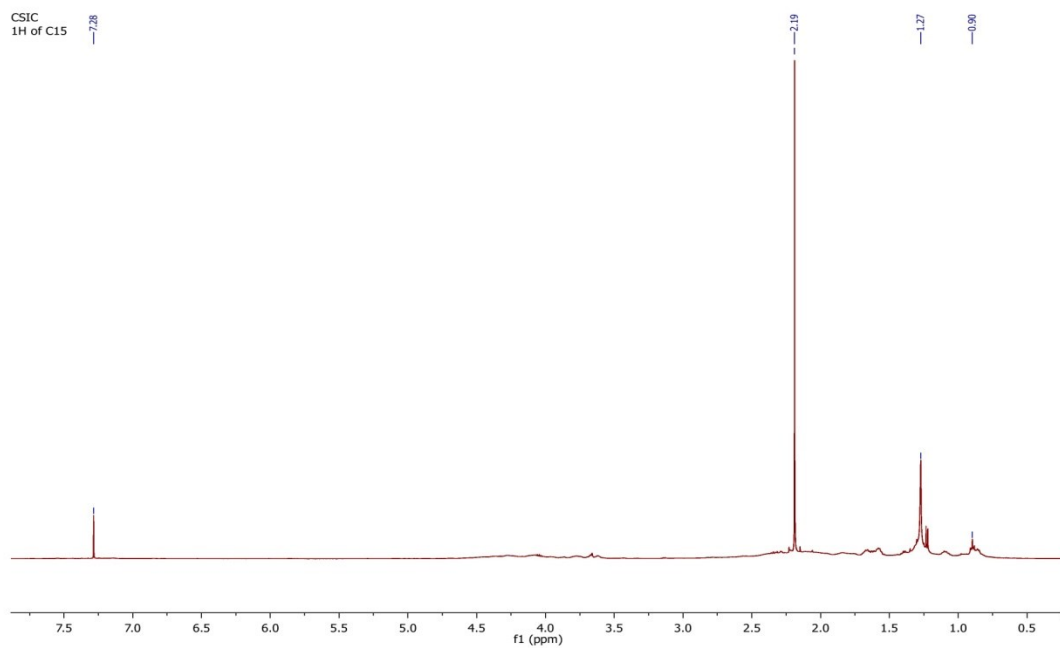

## 8. Reaction 10

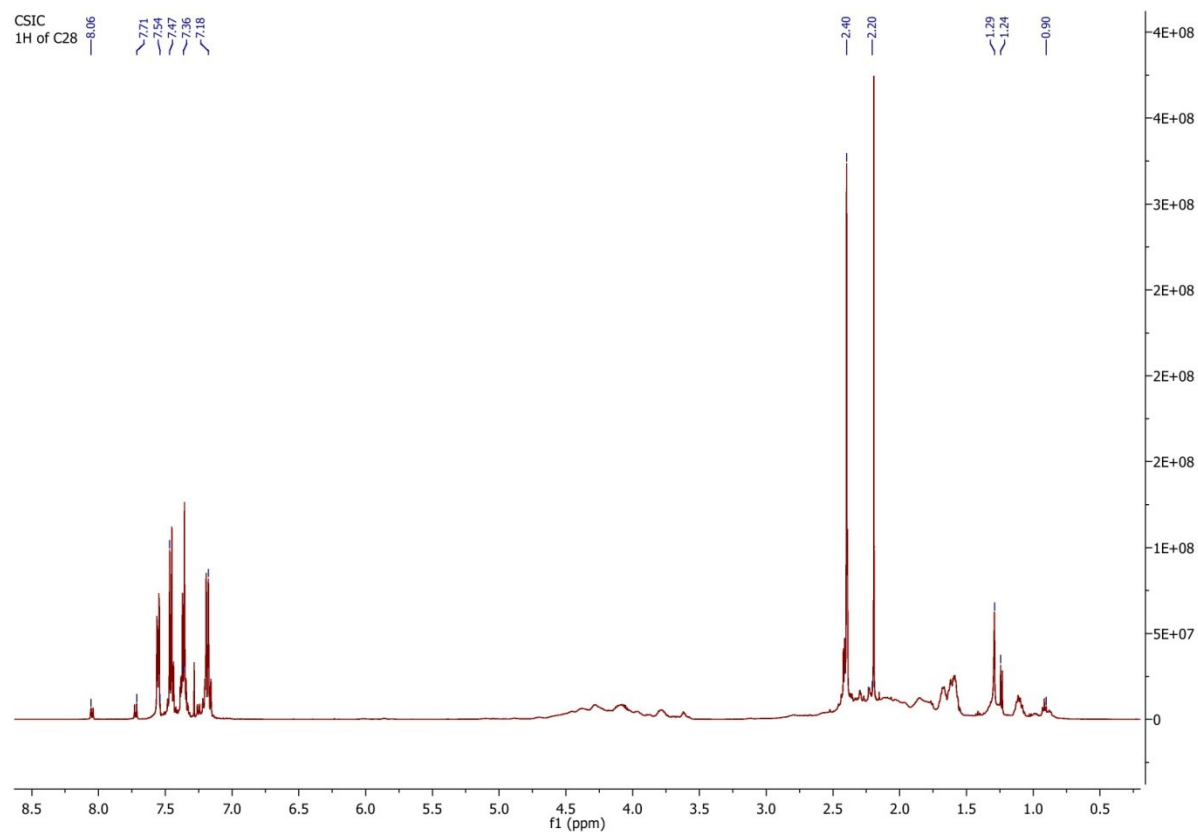

Supplement: d0ra01189d1.pdf [file d0ra01189d1.pdf]
